# Supplementary material for: Participatory Research for the Evaluation of Satisfaction with Solar Decathlon Competitions: A Survey Analysis
Source: MDPI journal article supplement (doi:10.3390/su132312995), 2021-11-24

# **WORLDWIDE SURVEY 2020 QUESTIONS - SOLAR DECATHLON**

## **CLASSIFICATION QUESTIONS:**

1 - If you participated in previous competitions, indicate the one/s you took part in:

- SD US 2002
- SD US 2005
- SD US 2007
- SD US 2009
- SD US 2011
- SD US 2013
- SD US 2015
- SD US 2017
- SD US 2019/20
- SDE 2010
- SDE 2012
- SDE 2014
- SDE 2019
- SD CHINA 2013
- SD CHINA 2018
- SD LATIN AMERICA 2015
- SD LATIN AMERICA 2019
- SD MIDDLE EAST 2018
- SD MIDDLE EAST 2021
- SD AFRICA 2019

2 - If it were possible, Would you like to compete again?

- Yes
- No

3 - Would you recommend taking part to others?

- Yes
- No

4 - During competition you were: (mandatory question)

Note: If you have participated in more than one competition with different roles, please, answer a survey for each role.

- BSc Student
- MSc Student
- Phd Student
- Professor
- Institution
- Organizer
- Company
- Professional
- Citizen

**GENERAL QUESTIONS:**

Note: The respondents of all five categories - Students (BSc, MSc and Phd), Professors/ Institutions, Organizers, Professional/Company and Citizens - answer the questions in this section.

5 - Do you consider SD as a global positive experience?

- Yes
- No

6 - In your opinion which is the main reason why you are satisfied with SD? (Choose 1)

- Innovation & Knowledge Generation
- Fostering Education
- Social Awareness
- Professional Awareness
- Media and Social Media Impact
- Environmental and Sustainability Awareness
- Students Employability
- All of them

7 - In your opinion which goal did SD not achieve? (Choose 1)

- Innovation & Knowledge Generation
- Fostering Education
- Social Awareness
- Professional Awareness
- Media and Social Media Impact
- Environmental and Sustainability Awareness
- Students Employability
- All of them

8 - Score the goal levels achieved in SD Competition:

Note: Evaluate each question independently, where 1 is the lowest grade and 6 the highest.

- Innovation & Knowledge Generation
- Fostering Education
- Social Awareness
- Professional Awareness
- Media and Social Media Impact
- Environmental and Sustainability Awareness

9 - Evaluate in which of the following areas SD had the most impact:

Note: Evaluate each question independently, where 1 means that SD has not impact at all and 6 means it has a full impact.

- Education
- Research
- Innovation Transfer
- Social Awareness
- University Community
- Media Impact

- Professional Workforce

10 - Are the following Contests appropriate for SD competition?

Note: Evaluate each question independently, where 1 is the lowest grade and 6 the highest.

- Architecture
- Engeneering + Construction
- Energy Efficiency
- Electrical Energy Balance
- Comfort Condicions
- House Functioning
- Communication & Social Awareness
- Urban Design, Transportation & Affordability
- Innovation
- Sustainabiliy & Circular Economy

### **SPECIFIC QUESTIONS:**

Note: Not all categories have access to these questions.

11 - I consider the impact of SD+associated events on these topics/institutions was: (all categories)

Note: Evaluate each question independently, where 1 is the lowest grade and 6 the highest.

- Market & Professionals
- Scientific Community
- University
- Childrenhood & Teenagers
- Society - General Public
- Education
- Research & Innovation
- Sustainable Awareness
- Energy Efficiency / Saving Awareness

12 - Solar Decathlon improved students awareness in: (Only Students, Professors/Institutions and Organizers)

Note: (Choose 4)

- Sustainability
- Energy Efficiency
- Innovation & Emerging Technologies
- Life Cicle Cost of Materials
- Passive Strategies
- Need of Making People Aware
- Carboon Emissions
- Solar Energy (PV and Thermal)
- Water Usability
- Affordability, Low Coast
- Construction Impact
- Good Teamwork
- National Media Attention
- Needs of Education

13 - Solar Decathlon developed students experience in: (Only Students, Professors/Institutions and Industry/Professionals)

Note: (Choose 4)

- Communication
- Team Working
- Sharing with other people/cultures
- Friendship
- Leadership
- Management
- Risk Management
- Resilience
- Networking
- Openminded

14 - Solar Decathlon developed my knowledge in: (Except Citizens)

Note: (Choose 4)

- Project Management
- Energy e Efficiency Pasive Design
- Architecture & Engineering Integration
- Communication
- Renewable Energies
- Net Zero Energy Houses/Clusters
- Thermal Knowledge
- BIM - CAD
- Green Building Design
- Practical Construction
- Organization, Time Management
- Engineering & Construction
- Buildings Code

15 - Solar Decathlon improved my skills in: (Except Professors/Institutions)

Note: Evaluate each question independently, where 1 is the lowest grade and 6 the highest.

- Project Management
- Team Working
- Communication & Public Relations
- Construction
- Leadership
- Practical Skills
- Modelling, Simulations
- Temperance Under Stress
- Creativity

16 - Which contests have contributed more in students education? (Only Students, Professors/Institutions and Organizers)

Note: (Choose 2)

- Architecture
- Engineering + Construction
- Energy Efficiency
- Electrical Energy Balance

- Comfort Conditions
- House Functioning
- Communication & Social Awareness
- Urban Design, Transportation & Affordability
- Innovation
- Sustainability & Circular Economy

17 - Which contests have contributed more in sustainability & energy awareness?  
(Only Students, Professors/Institutions and Organizers)  
Note: (Choose 2)

- Architecture
- Engineering + Construction
- Energy Efficiency
- Electrical Energy Balance
- Comfort Conditions
- House Functioning
- Communication & Social Awareness
- Urban Design, Transportation & Affordability
- Innovation
- Sustainability & Circular Economy

18 - Which contests have contributed more in media impact and social awareness?  
(Only Students, Professors/Institutions and Organizers)  
Note: (Choose 2)

- Architecture
- Engineering + Construction
- Energy Efficiency
- Electrical Energy Balance
- Comfort Conditions
- House Functioning
- Communication & Social Awareness
- Urban Design, Transportation & Affordability
- Innovation
- Sustainability & Circular Economy

19 - Which contest have contributed more in market & professional technical innovation? (Only Professors/Institutions and Organizers)  
Note: (Choose 2)

- Architecture
- Engineering + Construction
- Energy Efficiency
- Electrical Energy Balance
- Comfort Conditions
- House Functioning
- Communication & Social Awareness
- Urban Design, Transportation & Affordability
- Innovation
- Sustainability & Circular Economy

# WORLDWIDE SURVEY 2020 RESULTS - SOLAR DECATHLON

## CLASSIFICATION QUESTIONS:

1 - If you participated in previous competitions, indicate the one/s you took part in:

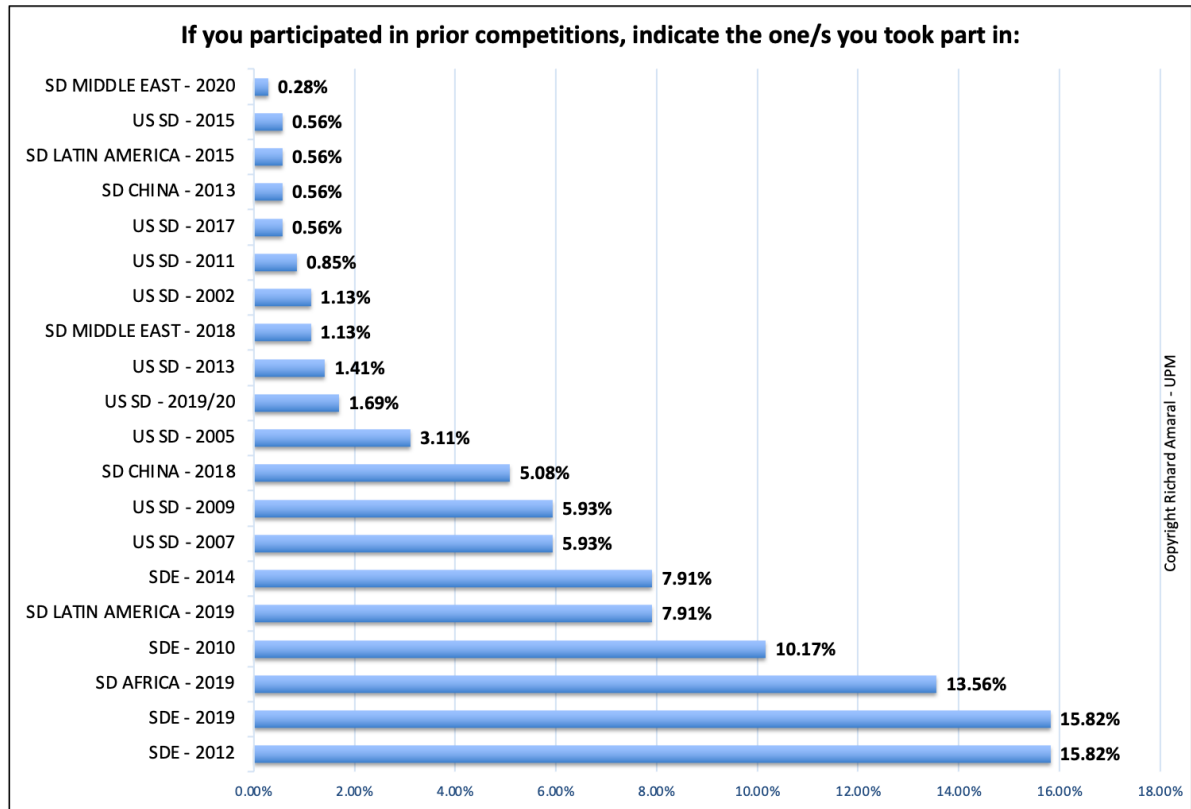

2 - If it were possible, Would you like to compete again?

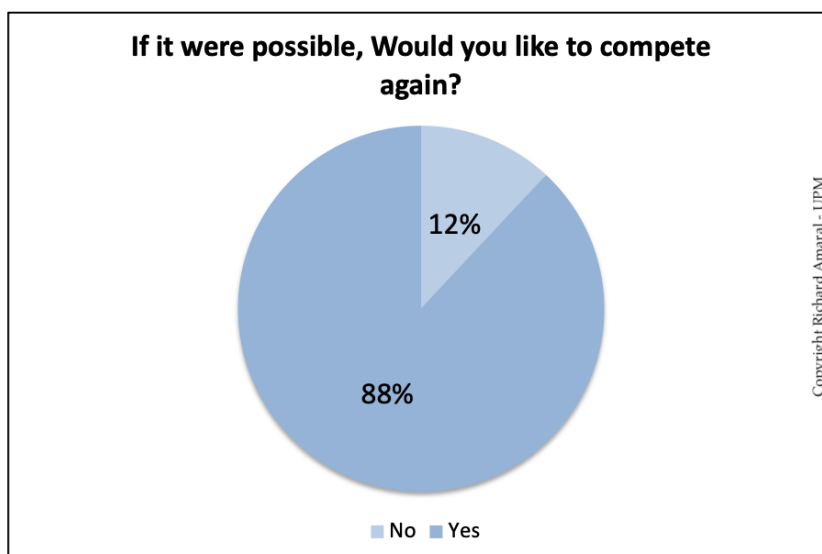

3 - Would you recommend taking part to others?

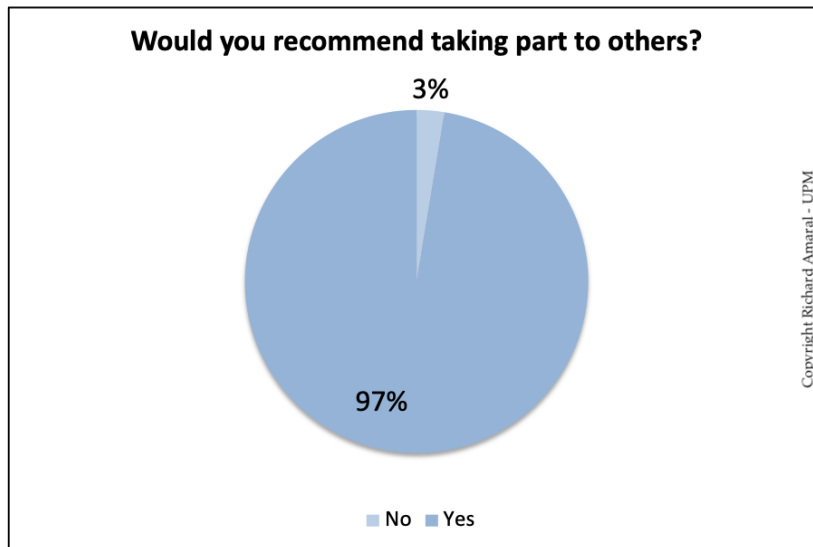

4 - During competition you were: (mandatory question)

Note: If you have participated in more than one competition with different roles, please, answer a survey for each role.

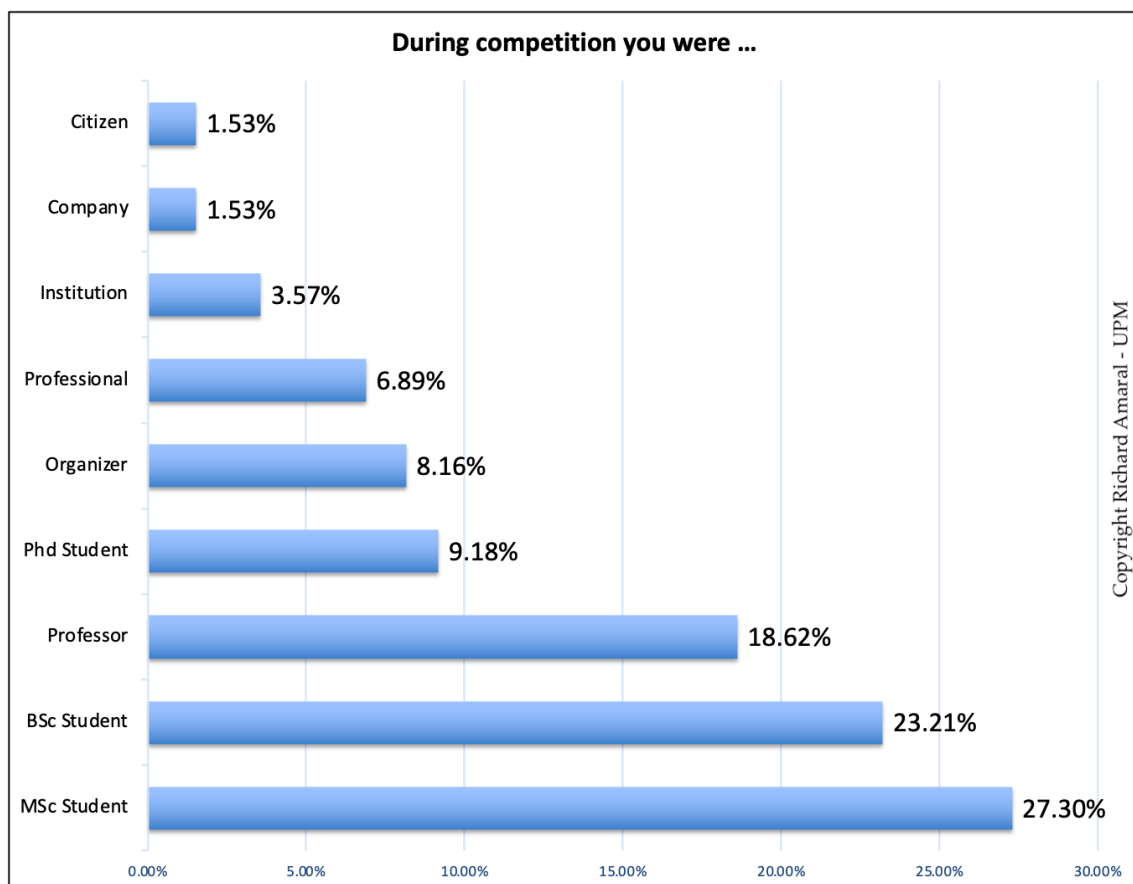

#### GENERAL QUESTIONS:

Note: The respondents of all five categories - Students (BSc, MSc and Phd), Professors/ Institutions, Organizers, Professional/Company and Citizens - answer the questions in this section.

5 - Do you consider SD as a global positive experience?

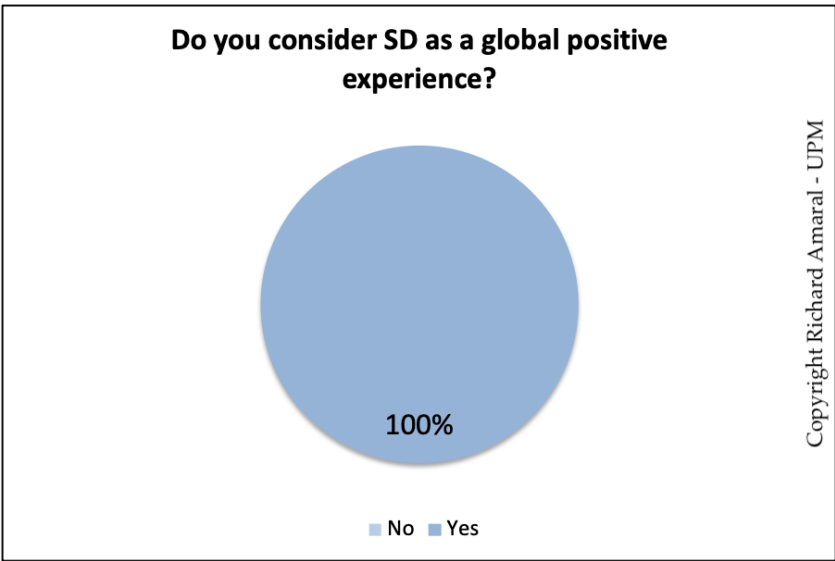

6 - In your opinion which is the main reason why you are satisfied with SD? (Choose 1)

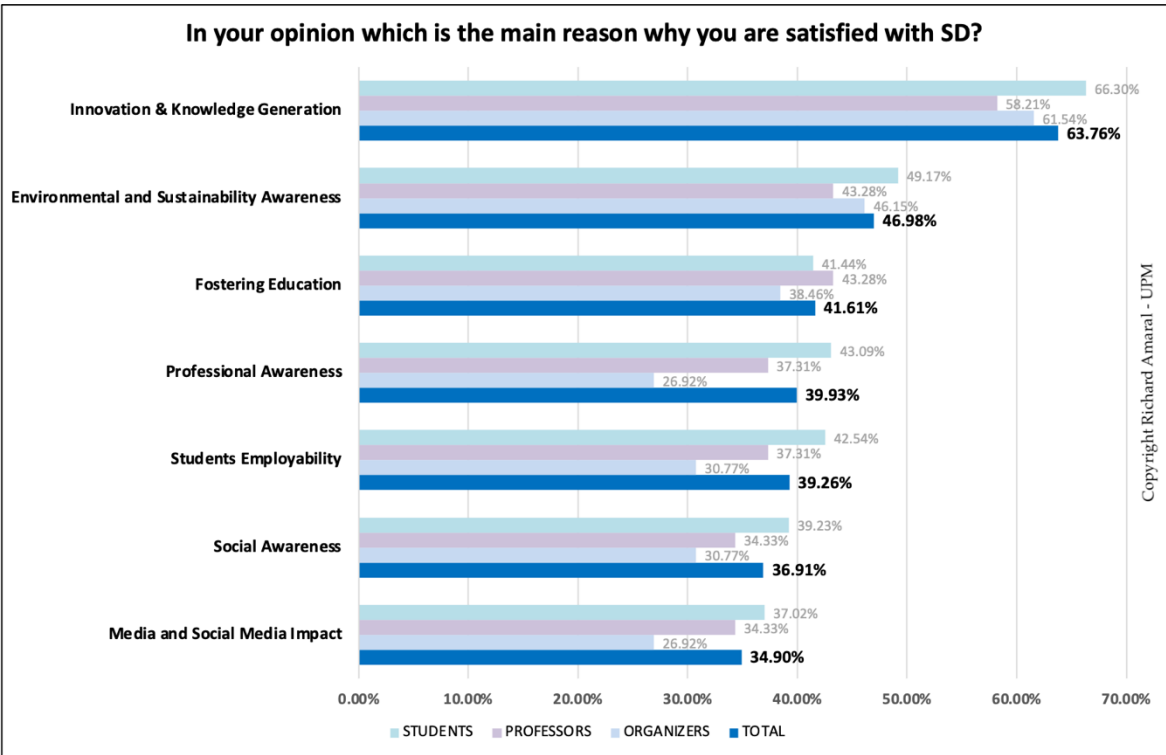



7 - In your opinion which goal did SD not achieve? (Choose 1)

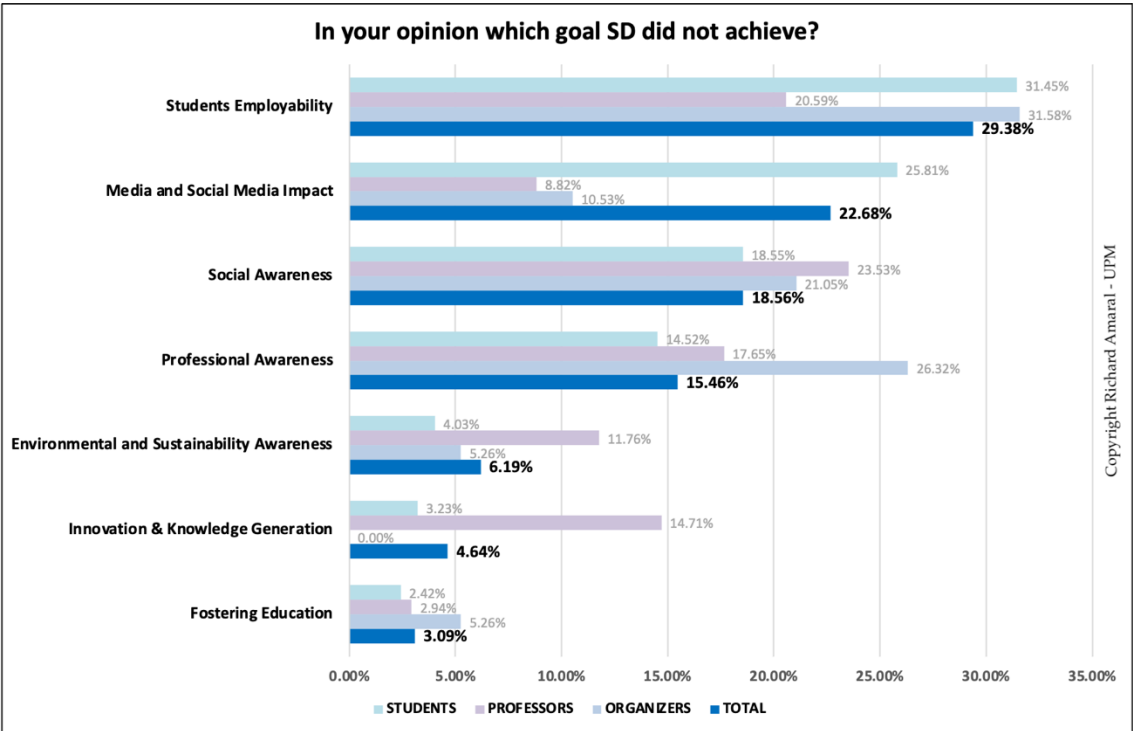

8 - Score the goal levels achieved in SD Competition:  
Note: Evaluate each question independently, where 1 is the lowest grade and 6 the highest.

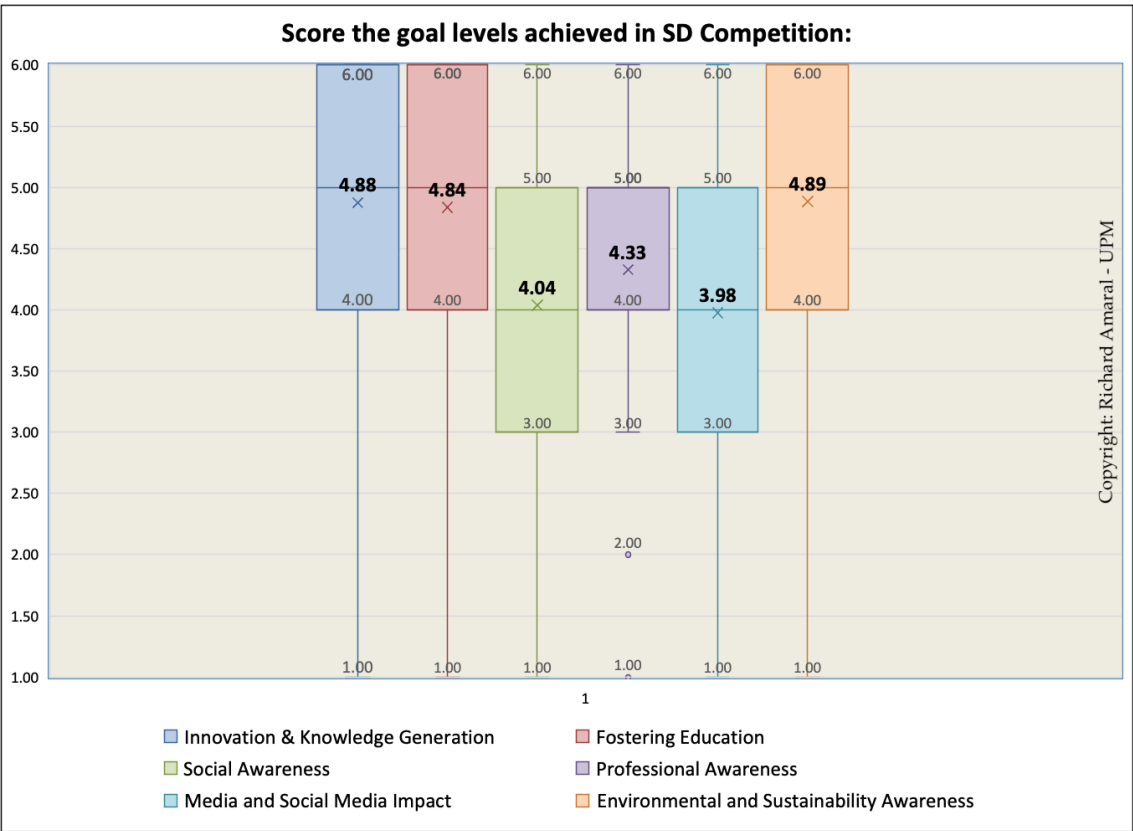

9 - Evaluate in which of the following areas SD had the most impact:  
Note: Evaluate each question independently, where 1 means that SD has not impact at all and 6 means it has a full impact.

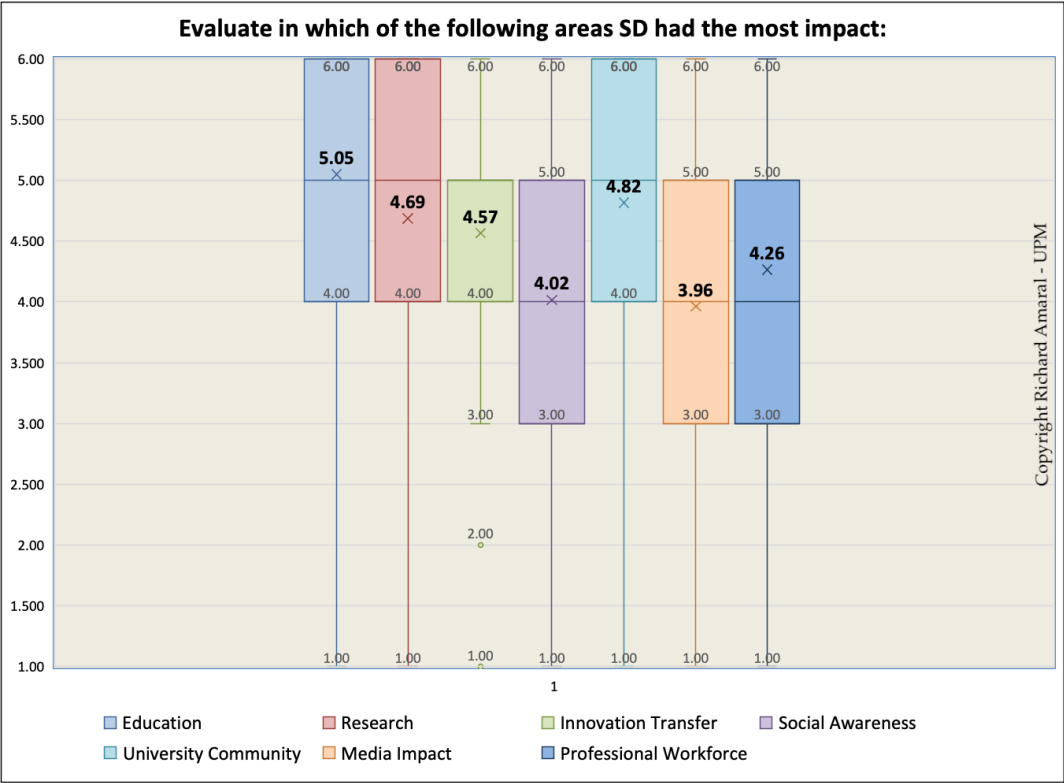

10 - Are the following Contests appropriate for SD competition?  
Note: Evaluate each question independently, where 1 is the lowest grade and 6 the highest.

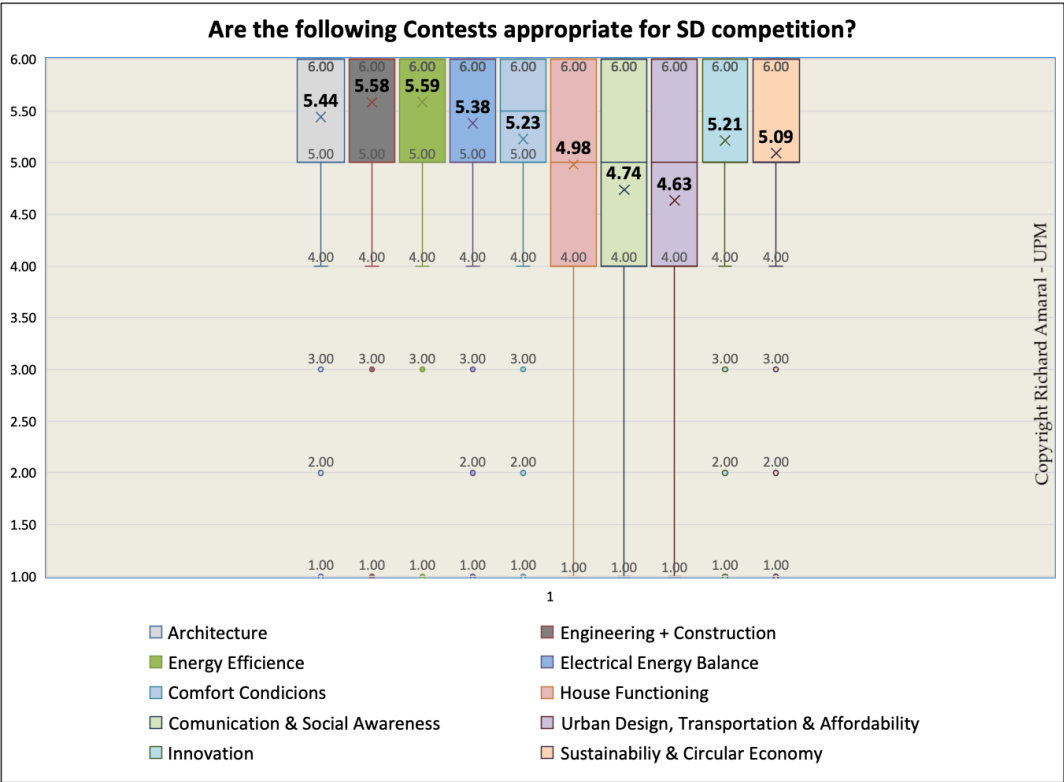

## SPECIFIC QUESTIONS:

Note: Not all categories have access to these questions.

11 - I consider the impact of SD+associated events on these topics/institutions was: (all categories)

Note: Evaluate each question independently, where 1 is the lowest grade and 6 the highest.

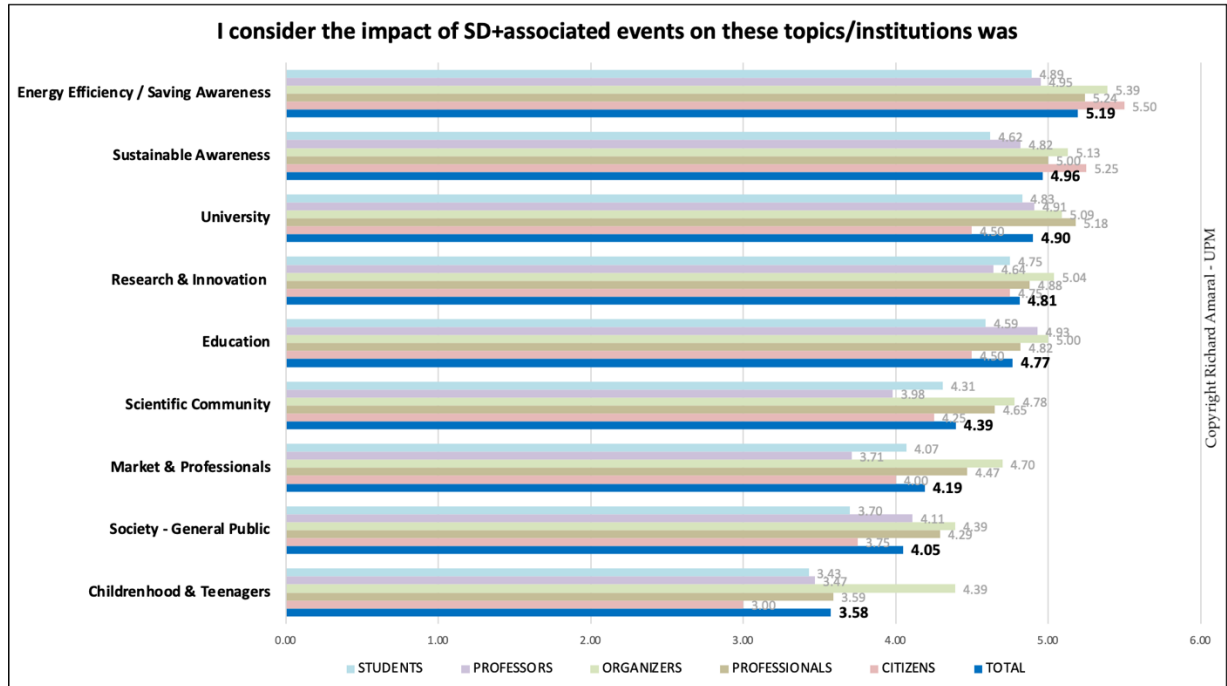

12 - Solar Decathlon improved students awareness in: (Only Students, Professors/Institutions and Organizers)

Note: (Choose 4)

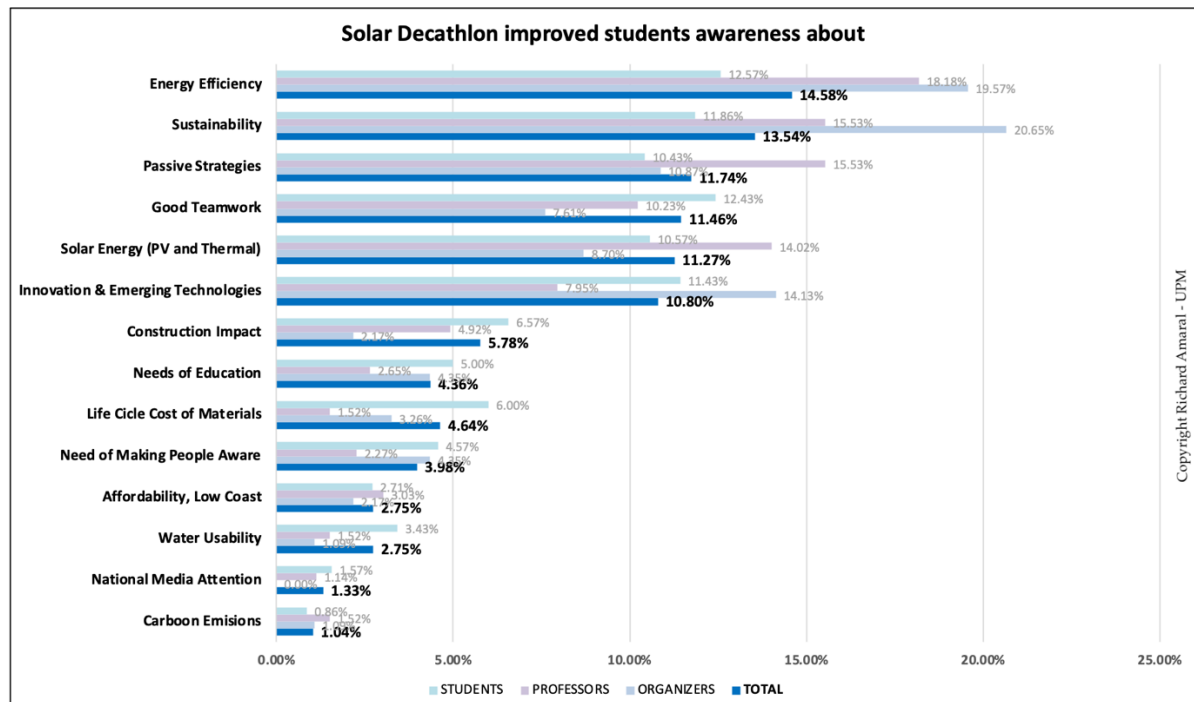

13 - Solar Decathlon developed students experience in: (Only Students, Professors/Institutions and Industry/Professionals)  
Note: (Choose 4)

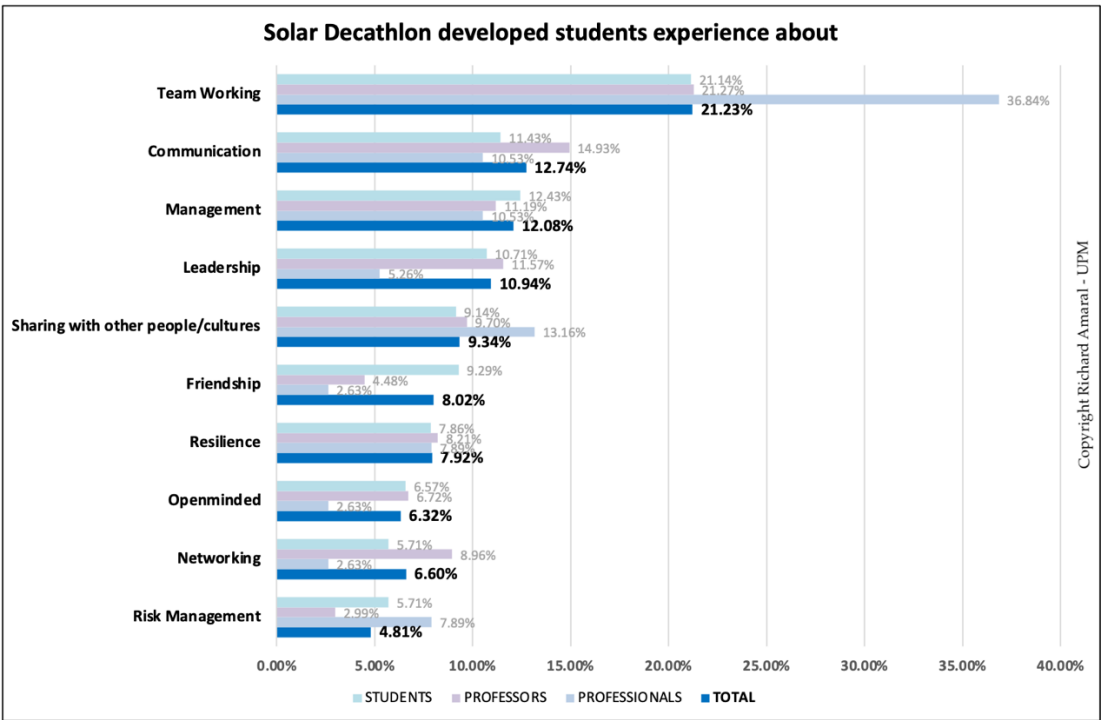

14 - Solar Decathlon developed my knowledge in: (Except Citizens)  
Note: (Choose 4)

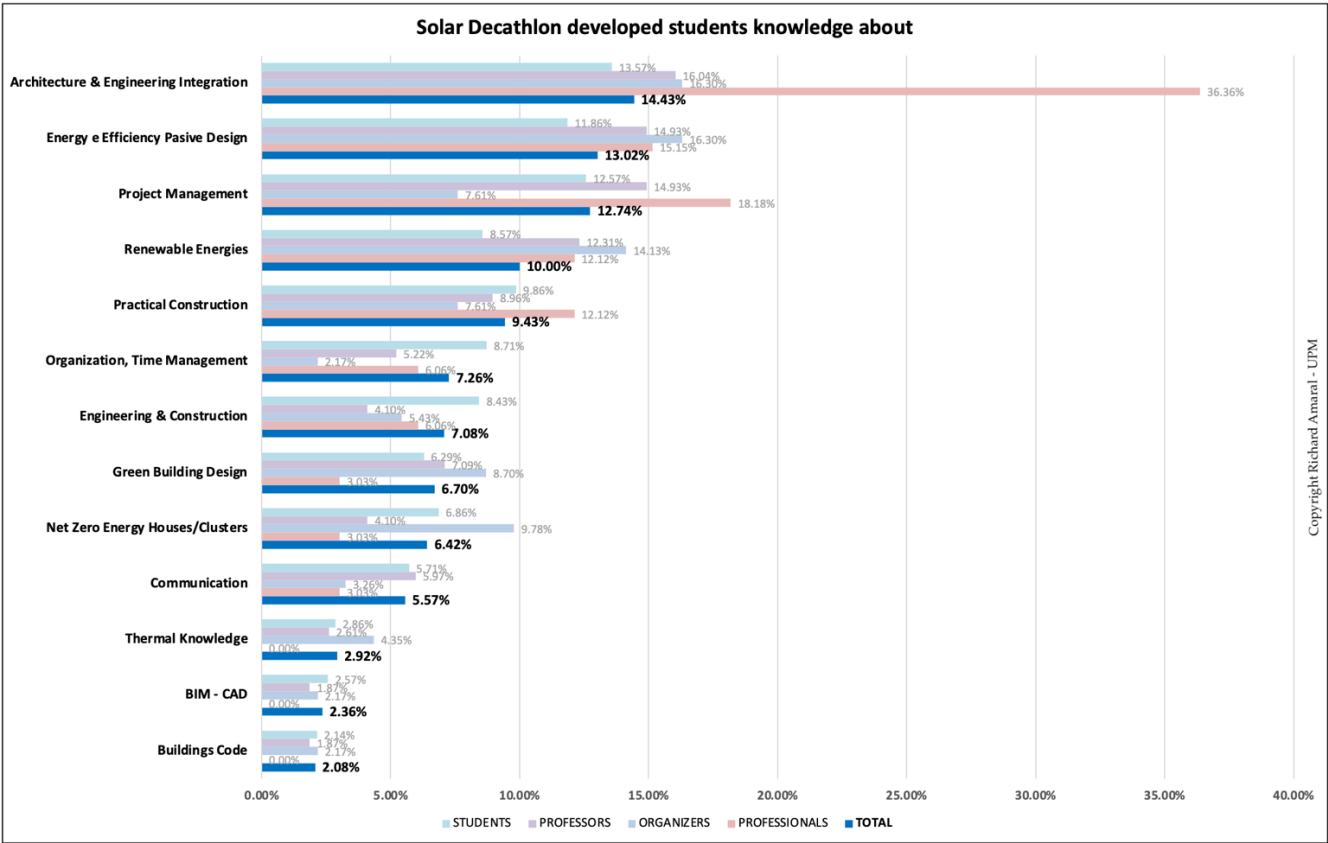

15 - Solar Decathlon improved my skills in: (Except Professors/Institutions)  
 Note: Evaluate each question independently, where 1 is the lowest grade and 6 the highest.

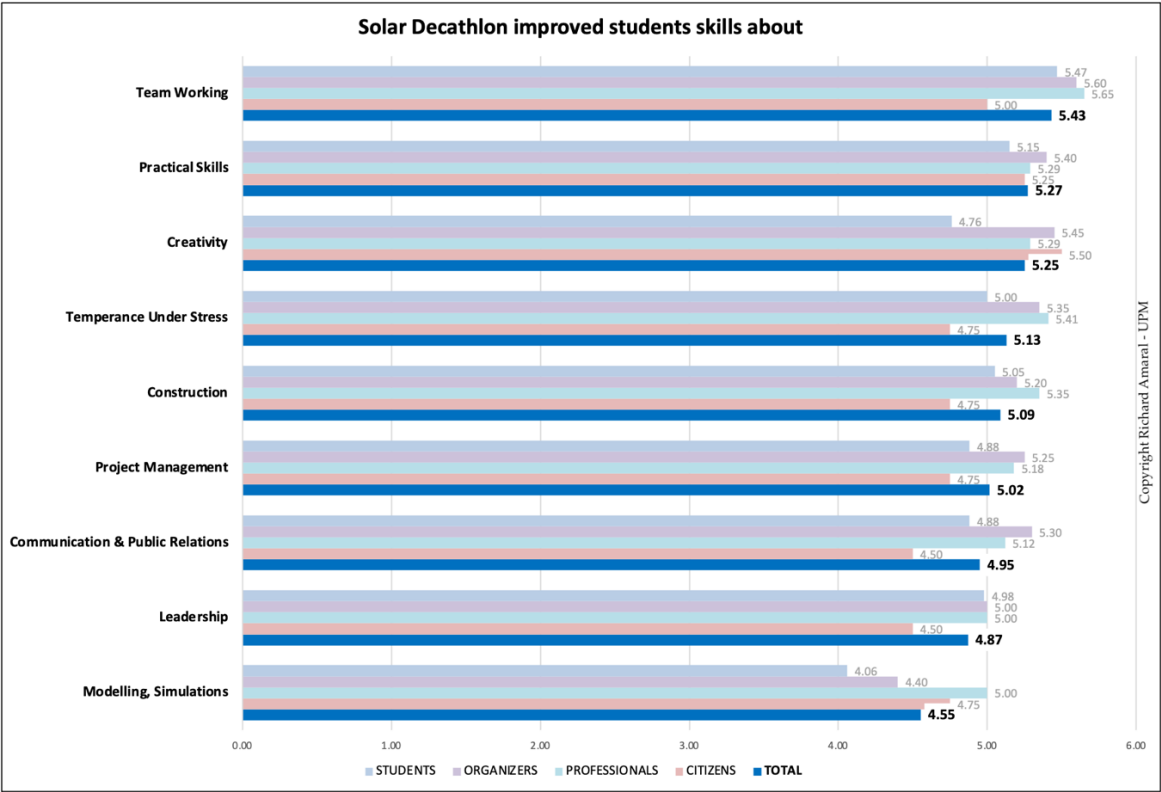

16 - Which contests have contributed more in students education? (Only Students, Professors/Institutions and Organizers)  
 Note: (Choose 2)

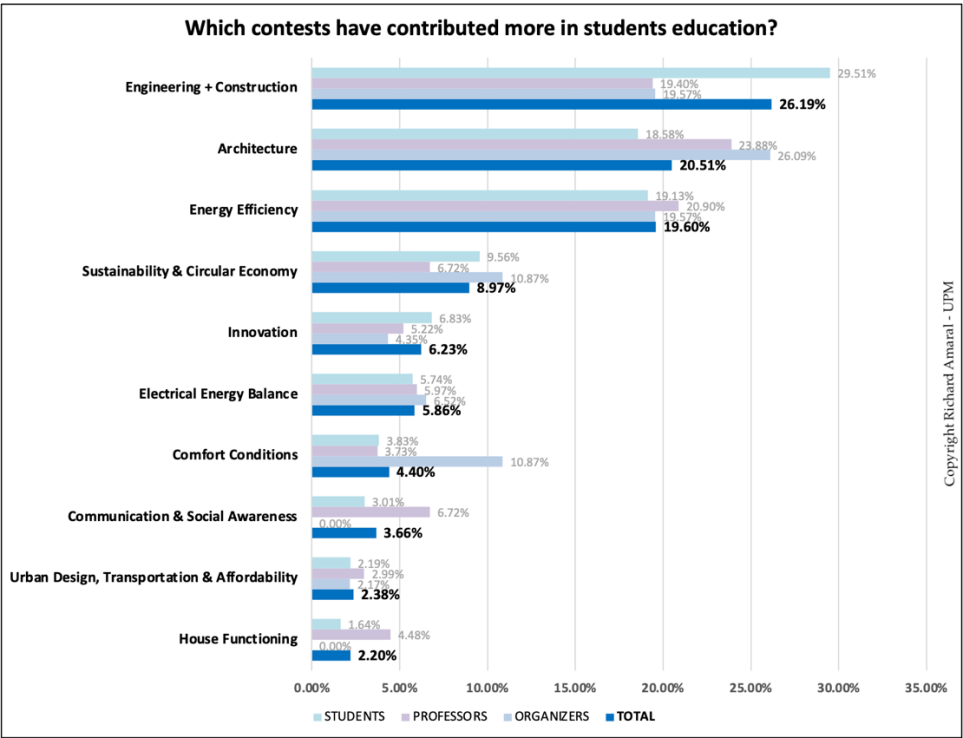

17 - Which contests have contributed more in sustainability & energy awareness?  
 (Only Students, Professors/Institutions and Organizers)  
 Note: (Choose 2)

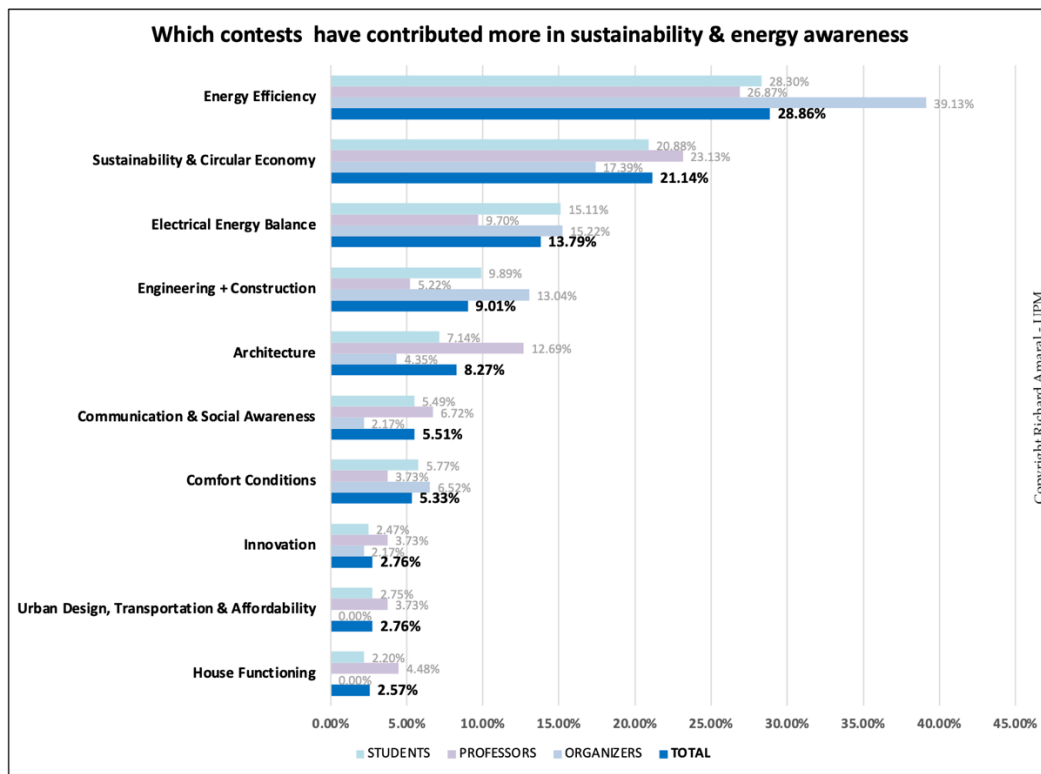

18 - Which contests have contributed more in media impact and social awareness?  
 (Only Students, Professors/Institutions and Organizers)  
 Note: (Choose 2)

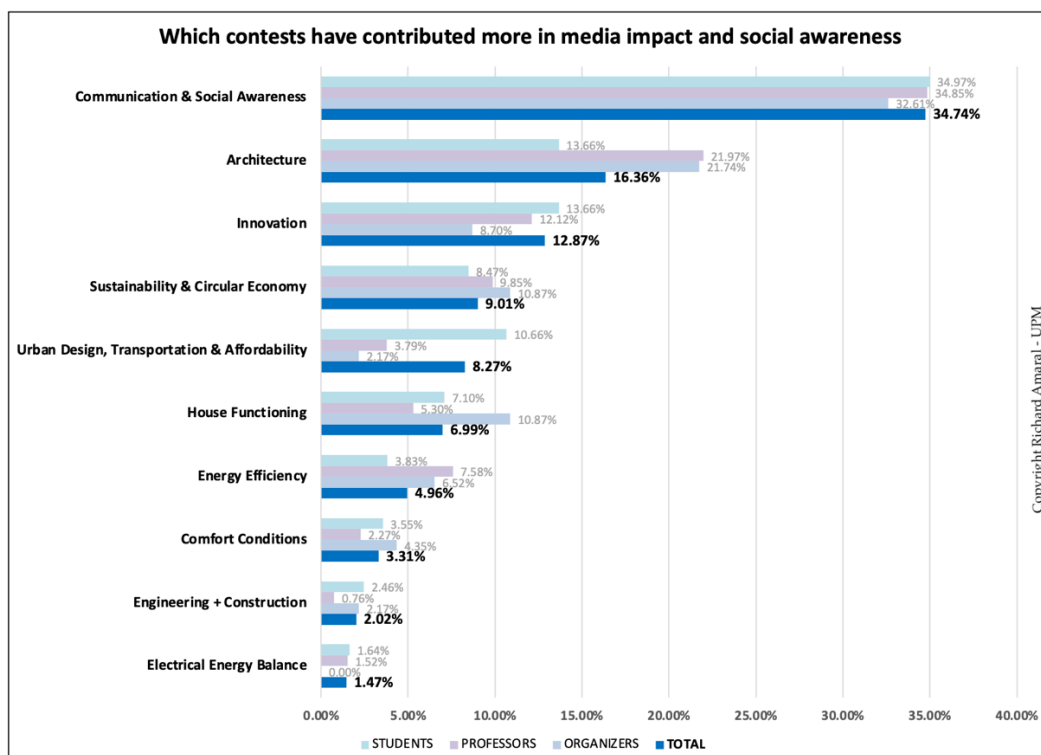

19 - Which constest have contributed more in market & professional technical innovation? (Only Professors/Institutions and Organizers)  
Note: (Choose 2)

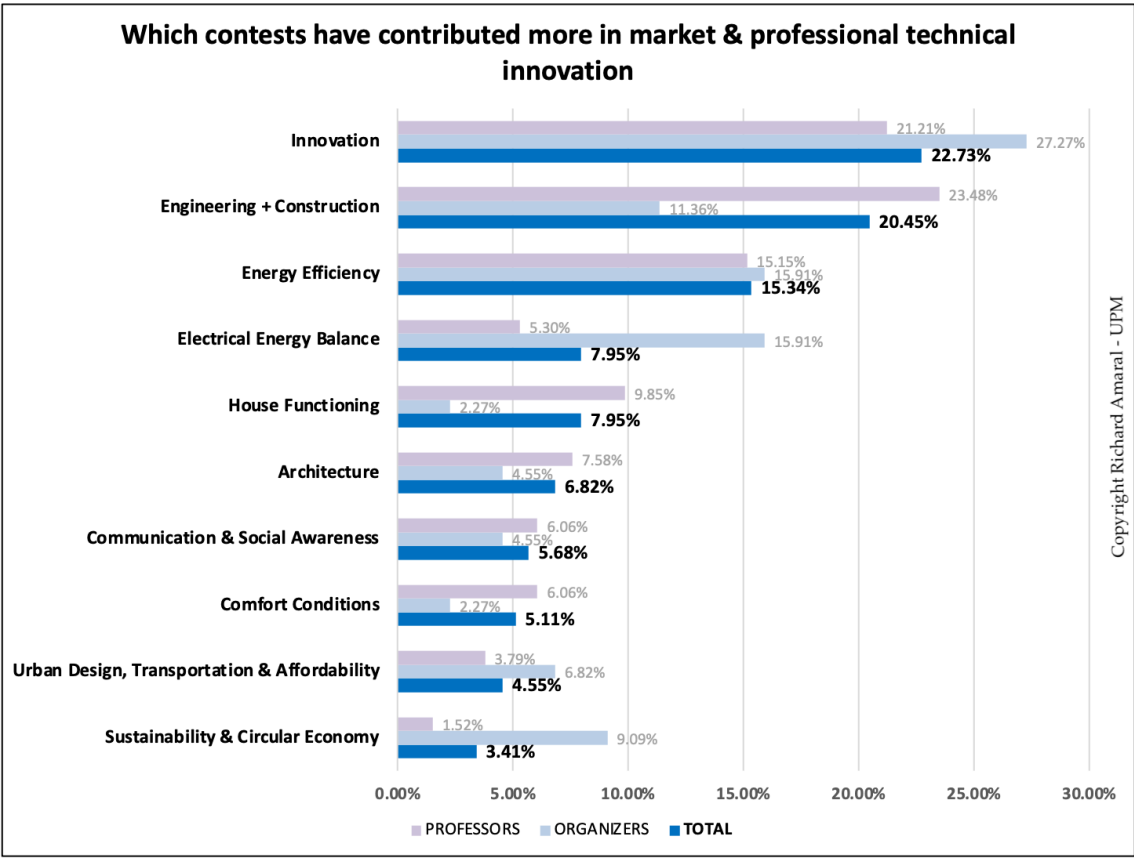

Supplement: s1 [file s1]
